# Supplementary material for: Tendency Towards the Average? The Aesthetic Evaluation of a Quantitatively Average Music Performance
Source: Oxford University Press journal article supplement (doi:10.1525/mp.2018.36.1.98), 2018-08-21
Supplement: supplementary_material.docx [file supplementary_material.docx]

**Tendency Towards the Average? – The Aesthetic Evaluation of a Quantitatively Average Music Performance: A Successful Replication of Repp’s (1997) Study**

Supplementary Material

Study instructions in German and English (translation)

Liebe/-r Studienteilnehmer/-in, wir freuen uns über Ihr Interesse an unserer Studie. In dieser Onlineumfrage geht es um die Erforschung ästhetischer Präferenzen verschiedener Interpretationen desselben Klavierstückes. Bevor Sie in die Rolle eines Jurymitgliedes von einem Klavierwettbewerb schlüpfen, bitten wir Sie, einige demographische Fragen zu beantworten. Das Bearbeiten des Fragebogens wird nicht mehr als 15 Minuten in Anspruch nehmen.Vielen Dank!

*Dear Participant,*

*We are glad about your interest in our study. This online study is concerned with research on aesthetic preferences for different interpretations of the same piano piece.*

*Before you slip into the role of a jury member at a piano competition, we would like to ask you to answer a few demographic questions.*

*The completion of this questionnaire will not take more than 15 minutes.*

*Thank you very much!*

******Damit Sie mit dem Stück des Klavierwettbewerbs vertraut werden und sich der verantwortungsvollen Aufgabe eines/-r Juror/-in gewachsen fühlen, hören Sie auf den nächsten Seiten alle Interpretationen durch. Dafür stellen wir Ihnen einige Fragen über Ihre persönliche Beziehung zu dem Stück.Es geht dabei lediglich um Ihre persönlichen Einstellungen und Erfahrungen! Ihre Aussagen werden nicht bewertet!

*To familiarize you with the piece of this piano competition and to brief you about the responsible role of a jury member, you will listen to all interpretations on the next pages. In this process, we will ask you a few questions about your personal connection to the piece.*

*This is only about your unique preferences and experiences! Your replies will not be scored!*

*****Sie hören gleich die Interpretationen der fünf Wettbewerbsteilnehmer. Bitte bewerten Sie diese jeweils hinsichtlich der vorgegebenen einheitlichen Kriterien.

Folgen Sie dabei Ihrem subjektiven Empfinden, denn es gibt keine richtigen oder falschen Antworten!

*You will now hear all the interpretations of the five competition participants.*

*Please evaluate them with regards to the given standardized criteria.*

*Simply follow your subjective opinion; there are no right or wrong replies.*

Table S1.

| **Item (English translation and original German)**  ***Underlined words: Abbreviation of the item*** | **Scale** | **Steps** |
| --- | --- | --- |
| The tempo of the interpretation was…  [Das Tempo der Interpretation war…] | rather inapproriate/rather appropriate  [eher unangemessen/eher angemessen] | 1–4 |
| The dynamics of the interpretation were…  [Die Dynamik der Interpretation war…] | rather inappropriate/rather appropriate | 1–4 |
| The expression of the interpretation was…  [Der Ausdruck der Interpretation war…] | rather inappropriate/rather appropriate | 1–4 |
| The interpretation is rather individual.  [Diese Interpretation ist eher individuell.] | disagree/agree  [trifft nicht zu/trifft zu] | 1–4 |
| The interpretation is rather conventional.  [Diese Interpretation ist eher konventionell.] | rather inapproriate/rather appropriate | 1–4 |
| The interpretation reminds me of other recordings that I have heard before.  [Diese Interpretation erinnert mich an Aufnahmen, die ich früher schon gehört habe.] | rather inapproriate/rather appropriate | 1–4 |

| There are not many musicians who interpret the piece like this.  [Es gibt nicht viele Spieler, die das Stück so interpretieren.] | rather inapproriate/rather appropriate | 1–4 |
| --- | --- | --- |
| The overall quality is…  [Die Gesamtqualität bewerte ich als…] | very unconvincing/very convincing  [wenig überzeugend/sehr überzeugend] | 1–4 |
| Would you like to continue listening to this interpretation?  [Würden Sie diese Interpretation gern weiterhören?] | yes/no  [ja/nein] | 1/0 |

|  |  |
| --- | --- |
|  |  |

Figure S1. Distributions of the item ratings used in the Musical Quality Score. The fifth item, *continue listening*, was measured with a dichotomous scale and thus does not show a histogram of scale steps: Participants wanted to continue listening 668 times and did not want to continue listening 357 times.
